19 **Abstract**

20 Human body habitats are home to a diverse array of microbes, and within these  
21 microbial ecosystems, there are exchanges of genetic material, including virulence  
22 factors (VFs). Little is known about the diversity and abundance of VFs in different  
23 body sites and different types of diseases. We developed a virulome analysis pipeline  
24 using the species-specific sequence identity inferred from intraspecies ANI values to  
25 precisely assign reads to virulence factors. We characterized the human virulome  
26 from four body habitats, including the gut, oral cavity, skin, and vagina. Specifically,  
27 the diversity and abundance of VFs in the oral cavity were significantly higher than  
28 those in other body sites, including stool. We highlight the importance of sex-specific  
29 analysis when studying the human virulome. We analyzed data from more than 4,000  
30 samples across healthy and diseased subjects and 13 types of diseases from different  
31 metagenomic sequencing studies to characterize the disease-specific virulome.  
32 Atherosclerotic cardiovascular disease (ACVD) has a more diverse virulome than  
33 other diseases tested. Notably, many VFs, including genes for secretion systems and  
34 toxins, are more abundant in diseased subjects than in healthy controls. We present, to  
35 our knowledge, the most comprehensive healthy and diseased virulome dataset yet  
36 created.

## 37 **Background**

38 The human microbiome has been identified as an essential factor in many diseases,  
39 including obesity<sup>1</sup>, type 2 diabetes<sup>2</sup>, and cirrhosis<sup>3</sup>. Microbial metabolites and  
40 components influence the susceptibility of the host to many immune-mediated  
41 diseases and disorders<sup>4</sup>. Pathogen colonization is controlled by bacterial virulence and  
42 through competition with commensals<sup>5</sup>. Virulence factors (VFs) are typically defined  
43 as pathogen components whose loss specifically impairs virulence but not viability,  
44 including adhesins, toxins, exoenzymes, and secretion systems<sup>6</sup>. They are produced  
45 by pathogens that could cause diseases<sup>7</sup>. Although nonenterotoxigenic *B.*  
46 *fragilis* (NTBF) is a common component of the colon, enterotoxigenic *Bacteroides*  
47 *fragilis* (ETBF), which secretes *B. fragilis* toxin, could induce colonic tumors<sup>8</sup>.  
48 Recent studies suggest that colorectal cancer (CRC) is influenced by *pks*+  
49 *Escherichia coli*, which contains the colibactin-producing *pks* pathogenicity island,  
50 directly impacting oncogenic mutations<sup>9,10</sup>. These results highlight the need to  
51 characterize the microbiome at the strain level and the differences in VFs between  
52 healthy and diseased individuals. Moreover, we should also pay more attention to  
53 microbial communities for evaluating pathogenicity<sup>11</sup>. With metagenome sequencing,  
54 we can observe all microbial genes present in a complex community<sup>12</sup>, including VF  
55 genes. However, the extent and diagnostic implications of virulome contributions to  
56 different types of the disease remain unknown.

57  
58 Currently, the virulence factor database (VFDB, <http://www.mgc.ac.cn/VFs/>)  
59 provides up-to-date knowledge of VFs from various bacterial pathogens. It serves as a  
60 comprehensive warehouse of bacterial pathogenesis knowledge, including a core  
61 dataset covering experimentally verified VFs<sup>13</sup>. There are also many other virulence  
62 factor databases, including Victors<sup>14</sup>, PATRIC<sup>15</sup>, and PHI-base<sup>16</sup>. Hidden Markov  
63 models<sup>17</sup>, deep convolutional neural network models<sup>18</sup>, and VFalyzer<sup>19</sup> are used for  
64 VF classification in bacterial genomes. Whole-genome sequencing is an effective  
65 method to comprehensively identify VFs. However, the reliable and efficient  
66 characterization of VFs in the metagenome remains a challenge. Biosynthetic gene  
67 clusters could be predicted using ClusterFinder<sup>20</sup>, which also yields false-positive  
68 results. We wish to apply a reasonable and stringent cutoff to the VF analysis to  
69 exclude potential false positive matches.

70

71 Here, we used species-specific sequence identity (SSI) inferred from the mean ANI  
72 values per species to precisely assign reads to virulence factors. As little is known  
73 about the abundances and diversity of VF profiles in different body habitats, we  
74 randomly selected 1,497 metagenome datasets from habitats within the human skin,  
75 oral cavity, gut, and vaginal from the Human Microbiome Project (HMP) cohort to  
76 carry out virulome analysis. We highlight the importance of sex-specific analysis  
77 when studying the human virulome. We analyzed data from 4,000 samples across  
78 healthy and diseased subjects and 13 types of diseases from different metagenomic  
79 sequencing studies to characterize the disease-specific virulome. We present, to our  
80 knowledge, the most comprehensive healthy and diseased virulome dataset yet  
81 created.

## 82 Results

### 83 Curation of the virulence factor database and establishment of the 84 methodology for virulome classification

85 We curated the gene annotation of experimentally verified VFs in the VFDB, which  
86 comprises 3,228 experimentally verified gene sequences from 53 species of bacterial  
87 pathogens. *Legionella pneumophila*, *Escherichia coli*, and *Pseudomonas aeruginosa*  
88 were the top three species based on the number of their VF gene sequences in the  
89 dataset (Table S1). We manually inspected the VF gene categories. Adherence, T4SS,  
90 T3SS, invasion, toxin, and iron uptake systems were the top six categories (Table S2).

91

92 VFs are often species-specific and variably conserved between species<sup>21</sup>. The average  
93 nucleotide identity (ANI) was developed for bacterial species classification<sup>22</sup>. We  
94 performed intraspecies ANI analysis for each of the 53 species. Figure 1A shows that  
95 the ANI values range from 85.3% (*Pseudomonas stutzeri*) to 99.9% (*Bordetella*  
96 *pertussis*) for different species. We performed BLAST searches against the  
97 chromosome sequences in the complete bacterial genomes using species-specific  
98 sequence identity (SSI) thresholds and different fixed nucleotide identity cutoffs  
99 ranging from 99% to 90%. Barplot shows the number of pathogenic and  
100 nonpathogenic strains that hit at least one VF under different cutoffs (Figure 1B). In  
101 this experiment, SSI achieved almost the same high precision as 100% and 99% but at  
102 a markedly higher recall (Figure 1C). SSI performed the best in accuracy and F1  
103 scores since it identified a high number of TPs and did not introduce many FPs.

104

105 To further confirm our method's accuracy, we compared the sequence identity of  
106 experimentally verified VFs between strains within one species to the mean ANI  
107 value in the species. Two experimentally verified VFs, namely, VFG005177  
108 (gb|NP\_664456) and VFG000959 (gb|NP\_269190), were found in two strains, that is,  
109 *Streptococcus pyogenes* MGAS315 and *Streptococcus pyogenes* M1 GAS. The two  
110 genes' sequence identity was 98.9%, which is very similar to the mean ANI (98.8%)  
111 of *Streptococcus pyogenes*. In addition, VF identification that relies on fixed criteria  
112 by loose cutoffs may result in misannotations. For instance, when using an  
113 80% identity cutoff, the experimentally verified gene *eastI* in *Escherichia coli*  
114 ONT:HND str. A16 can be found in many nonpathogenic strains, including the

115 genome of *Candidatus Sodalis pierantonius* str. SOPE (CP006568.1). However, no  
116 experimentally verified virulence factor has been reported in this strain.

117

118 We identified a total of 2,893 VF gene sequences distributed across 5,250 strains  
119 within 74 species using a nucleotide identity cutoff value of 100% for the BLAST  
120 search against the chromosome sequences in the complete bacterial genomes. We  
121 manually inspected the newly identified species and found that all of them were also  
122 pathogens that could cause diseases, such as *Mycobacterium africanum*, *Klebsiella*  
123 *aerogenes*, and *Pseudomonas fluorescens*. This indicated that experimentally verified  
124 VFs were incomplete in the VFDB. In addition, we identified 31 prophage-  
125 encoded VFs, most of which were exotoxins.

126

127 We developed a virulome analysis pipeline that uses SSI inferred from the mean ANI  
128 values per species to precisely assign reads to virulence factors (Figure S1). With our  
129 expanded VF database termed VFGSSI, reference sequences of VFs were carefully  
130 chosen as seeds and integrated into the virulome analysis pipeline, making our  
131 database more comprehensive (Figure 1D). A list of pathogens in VFGSSI that can  
132 cause infections of the gastrointestinal tract or not and diseases they may cause are  
133 shown in Table S3 and Table S4.

#### 134 **Different body sites have distinct virulomes**

135 We analyzed 1,497 metagenome datasets from habitats within the human skin, oral  
136 cavity, gut, and vagina from the HMP cohort (Figure 2A). The overall alpha and beta  
137 diversity values for each body site were similar at the microbiome and virulome levels.  
138 The Shannon diversity values of the microbiome (Figure S2A) and virulome (Figure  
139 2B) in the oral cavity were significantly higher than those in other body sites.  
140 Principal coordinate analysis of Bray-Curtis dissimilarities showed that the primary  
141 patterns of variation in the microbiome (Figure S2B) and virulome (Figure 2C)  
142 followed the major body sites (oral cavity, gut, skin, and vagina).

143

144 A unique body site virulome composition was apparent. The mean VF abundances in  
145 the oral cavity were significantly higher than those in other body sites (Figure 2D). As  
146 expected, vaginal sites had the lowest VF abundance. Furthermore, the mean VF  
147 abundances in the samples at six major body sites are shown in Figure S3.

148 Specifically, the VF abundance in buccal mucosa was significantly higher than the VF  
149 abundance of other body sites. Hierarchical clustering of the prevalence of 106 VF  
150 genes (Figure 2E) and 15 VF functional categories (Figure 2F) is shown. In addition,  
151 we also performed LEfSe analysis to compare VFs (Figure S4). Specifically, in the  
152 oral cavity, the most differentially abundant VFs were capsular polysaccharide genes  
153 from antiphagocytosis.

154

155 The shared and unique VF genes among the groups were investigated. We found that  
156 200 VFs were shared among body sites, accounting for 33.8%, 23.8%, 23.4%, and  
157 43.8% of the total VFs identified in the gut, oral cavity, skin, and vagina, respectively  
158 (Figure S5A). Interestingly, the oral cavity and skin shared more VFs (689 types) than  
159 those shared between the gut and oral cavity (443 types) or between the gut and skin  
160 (444 types) (Figure S5B).

161

162 Interestingly, women showed a higher VF abundance in the skin and gut than men  
163 (ANOVA,  $p < 0.05$ , Figures S6A and S6B). Specifically, females had higher VF  
164 abundances in the anterior nares. In addition, sex-specific VFs for each body site were  
165 analyzed using LEfSe (Figures S7, S8, and S9). The availability of longitudinal  
166 samples of different body sites over two years from individuals who did not take  
167 antimicrobial drugs afforded us the ability to investigate the stability of virulomes  
168 over time (Figures S6C and S6D). There was no significant difference among samples  
169 from the same individuals except for the vagina, verifying that virulomes remained  
170 stable over a long period in different body habitats.

### 171 **Different disease types have distinct virulomes**

172 We focused on 13 types of diseases for which the virulome is largely unknown,  
173 including colorectal carcinoma (CRC), atherosclerotic cardiovascular disease  
174 (ACVD), inflammatory bowel disease (IBD), obesity, hypertension, Parkinson's  
175 disease (PD), non-small cell lung cancer (NSCLC), hepatocellular carcinoma (HCC),  
176 gastric cancer (GC), liver cirrhosis (LC), melanoma, renal cell carcinoma (RCC), and  
177 *Mycoplasma pneumoniae* pneumonia (MPP) (Figure 3A). As the original sequencing  
178 data of healthy individuals were missing in the NSCLC, RCC, melanoma, and HCC  
179 datasets, we developed an independent healthy cohort that served as a negative

180 reference using the HMP gut data as mentioned above, which made intergroup  
181 comparisons possible.

182

183 First, we found that ACVD had a more diverse virulome than all the other disease  
184 types tested (P-value <0.01 for each disease, Wilcoxon rank-sum test; Figure 3B).  
185 Compared to their own healthy controls, ACVD, CRC, and LC showed a higher  
186 diversity of VFs (p <0.01, Figures S12, S13, and S14). In contrast, we did not find a  
187 more diverse virulome in obesity, IBD, PD, GC, and hypertension compared with  
188 their healthy controls.

189

190 Next, VF category prevalence was compared between diseases, and a disease-  
191 specific virulome composition was also clear (Figure 3C). We initially defined three  
192 groups for further VF category classification: high prevalence (>90%), medium  
193 prevalence (with prevalence ranging from 70% to 90%), and modest prevalence  
194 (<70%). VF categories including invasion, adherence, and iron uptake system  
195 composed the high prevalence group, characterized by consistently high prevalence in  
196 healthy and disease groups. Another six VF categories, including toxin,  
197 antiphagocytosis, autotransporter, T2SS, serum resistance, and T3SS, were the  
198 medium group members and were predominant in specific diseases. VF categories  
199 such as T6SS, Ig protease, exoenzyme, and regulation were divided into the modest  
200 group for their less predominant prevalence.

201

202 Moreover, hierarchical clustering of the mean abundance of representative VFs for  
203 each disease type is shown in Figure 3D. The top 10% (referring to the ratio of VF  
204 type numbers) of the most abundant VF genes in each type of disease, which were  
205 considered the representative VFs, are summarized in Supplementary Table S5.  
206 Specifically, compared to HMP healthy individuals, many VFs belonging to toxins  
207 were more abundant in obese individuals, while VFs encoding the iron uptake system  
208 were more abundant in hypertensive individuals. T6SS and antiphagocytosis genes  
209 were more abundant in patients with ACVD than in their healthy controls (Figure  
210 S15). Apart from invasion, adherence, and the iron uptake system, which were the  
211 universally discovered representative VF categories in those diseases, two clusters of  
212 VFs encoding secretion systems and toxins were found in ACVD and CRC patients,



213 respectively, the existence of which distinguished CRC and ACVD from other  
214 diseases.

215

216 We then focused on the VF genes encoding secretion systems and toxins and their  
217 pathogenic potential in ACVD and CRC. From the toxin's perspective, 12 VF genes  
218 encoding colibactin in *Klebsiella pneumoniae* and two genes encoding heat-stable  
219 enterotoxin 1 and L-lysine 6-monooxygenase IucD in *Escherichia coli* were  
220 significantly enriched in patients with CRC, while only endotoxin genes participating  
221 in LPS and capsule biosynthesis were found in patients with ACVD.

222

223 We further analyzed the average abundance of VF genes in each type of secretion  
224 system separately (Figure S10). Remarkably, the type III secretion system VFs were  
225 enriched in many diseases, not limited to ACVD and CRC, whereas T6SS genes were  
226 more abundant in ACVD than in other diseases, implying their potential in inducing  
227 ACVD.

228

229 Given that the secretion systems in bacteria mediate bacterial-bacterial or host-  
230 bacterial competition by injecting diverse effectors, usually cytotoxic, into  
231 prokaryotic and eukaryotic cells<sup>23</sup>, we further analyzed the distribution of effectors in  
232 different groups (Figure S11). It was evident that different sets of effector genes were  
233 enriched in CRC and ACVD. As expected, many T3SS effectors were enriched in  
234 both CRC and ACVD patients. Importantly, we found the enrichment of one T6SS  
235 effector in the ACVD group, which supports our hypothesis that T6SS may play an  
236 essential role in the pathogenicity of ACVD.

237

238 In addition to fecal samples, we analyzed the respiratory tract metagenome of  
239 children, including 171 healthy children and 76 children with pneumonia. Overall, the  
240 diversity of VFs was significantly lower in healthy children's respiratory tract  
241 microbiomes than in children with pneumonia (Figure S16). Specifically, adhesin-  
242 related genes in *Mycoplasma pneumoniae* were more abundant in children with  
243 pneumonia (Figure S17). There were significant differences in respiratory microbial  
244 virulomes between healthy children and children with pneumonia, probably due to the  
245 differences in oropharyngeal microbial diversity<sup>24</sup>.

246 **Gut virulome comparison in diabetes mellitus (DM) and gestational diabetes**  
247 **(GDM) with in-house sequenced datasets**

248 We sequenced 150 fecal DNA samples from 50 healthy Chinese adults, 50 T2D (type  
249 2 diabetes mellitus), and 50 T2D+CVD (cardiovascular disease) patients using  
250 Illumina sequencing technology. A total of ~ 11 Gb per sample was obtained. The  
251 sequencing statistics are summarized in Table S6.

252

253 We found that patients with type 2 diabetes and cardiovascular diseases (T2D+CVD)  
254 had a more diverse virulome than patients with type 2 diabetes (T2D) and healthy  
255 controls (Figures 4A and 4B). Nonmetric multidimensional scaling (NMDS) analysis  
256 showed a clear separation between patients with T2D and healthy controls (Figure  
257 4D). Consistent with our observation that the VF abundances were higher than those  
258 in healthy controls (Figure 4C), we found that many VFs were significantly enriched  
259 in T2D+CVD and T2D samples compared with their healthy controls (Figure 4E).  
260 The LDA scores indicated that the abundances of autotransporter-related VFs were  
261 much more enriched in T2D, while adherence and T6SS were much more enriched in  
262 T2D+CVD. The most enriched VFs in T2D and T2D+CVD were derived from  
263 *Escherichia coli* and *Klebsiella pneumoniae*. Furthermore, we compared the  
264 abundance between mobile VFs and nonmobile VFs and found that nonmobile VFs  
265 were significantly higher than mobile VFs for each group (Figure S18).

266

267 To indicate the relationship between VFs, we performed Spearman's correlation  
268 analysis between VFs. The strong ( $q > 0.6$ ) and significant (adjusted P value  $< 0.05$ )  
269 correlations between VFs are shown in Figure 4F. Two major modules were identified  
270 within the network. One module contained VFs relating to T6SS, toxin,  
271 antiphagocytosis, adherence, and the iron uptake system. The other module contained  
272 VFs relating to T3SS, T2SS, adherence, and the iron uptake system. The VF modules  
273 are of particular interest because they represent the functional relationship between  
274 VFs. They may provide a systems perspective at the community level.

275

276 In contrast, we did not find a more diverse virulome in patients with GDM than in  
277 their healthy controls (Figure S19). DM showed a significantly diverse virulome over  
278 their healthy controls, while GDM had no statistically significant diverse virulome.

279 Therefore, GDM may represent transient DM, and the virulome appears to be relevant  
280 to DM pathogenesis but not GDM, although its underlying mechanisms are unknown.

281 **Selected samples of DM from short-read results confirmed by PacBio long-**  
282 **read sequencing**

283 To experimentally confirm the presence of VF genes in the human gut microbiome,  
284 we sequenced 9 fecal DNA samples from 3 healthy Chinese adults, 3 patients with  
285 T2D, and 3 patients with T2D+CVD using PacBio single-molecule real-time (SMRT)  
286 long-read sequencing technology. A total of ~ 20 Gb per sample with an average  
287 subread length of 8 kb was obtained with the PacBio Sequel II system. The  
288 sequencing statistics are summarized in Table S7. The assembly of PacBio reads  
289 yielded 37 large CCs from 1 to 5 Mb in length, considered to be bacterial  
290 chromosomes. It also generated 149 CCs (73.4 to 947.4 kb) classified as plasmids and  
291 5 CCs (54.4 to 12.2 kb in size) as phages.

292

293 Consistent with our findings using short-read sequencing, we found that many VF  
294 genes existed in fecal sample contigs from patients. The heatmap shows the VF  
295 distribution among the 9 human gut samples using SSI (Figure 5A). The  
296 mean numbers of VFs in T2D+CVD were significantly higher than those in the other  
297 two groups. Most of the VFs were derived from *Escherichia coli* and *Klebsiella*  
298 *pneumoniae*, consistent with Illumina sequencing observations. VF genes in the  
299 complete genome of the *Klebsiella pneumoniae* strain KP3037 are shown in Figure  
300 5B. Specifically, two distinct gene clusters encoding T6SS were identified and  
301 confirmed by VRprofile<sup>25</sup>, a web-based tool for profiling virulence traits encoded  
302 within genome sequences of pathogenic bacteria. Mobile element-like genes,  
303 including genes involved in virulence and antibiotic resistance, were the major  
304 differences between strains.

305

## 306 Discussion

307 In this study, we conducted a comprehensive whole-body virulome analysis of the  
308 healthy human microbiota. We analyzed data from more than 4,000 samples across  
309 healthy and diseased subjects and 13 types of diseases from different metagenomic  
310 sequencing studies to characterize the disease-specific virulome. As the actual  
311 functions in the pathogenesis of predicted VF-related genes remain unclear, only  
312 experimentally verified VFs were involved in our study. We expanded the VF  
313 database termed VFGSSI and used species-specific sequence identity (SSI) inferred  
314 from the mean ANI values per species to precisely assign reads to virulence factors.

315

316 Our findings have substantially expanded our insight into the abundance and diversity  
317 of VFs in different body sites. Differences in the environmental conditions between  
318 different body habitats may be reflected in the microbiome and, consequently, the  
319 virulome. We observed a unique body-site virulome composition in this study. These  
320 findings illustrate that the healthy human microbiota, in general, beyond the gut  
321 microbiota, is a reservoir for virulence factors. This reservoir may serve as a mobile  
322 gene pool that facilitates VF transmission. The differences in eating habits, personal  
323 care, and lifestyles between men and women may lead to sex-specific differences in  
324 the composition of VF genes. Our results highlight the importance of sex-specific  
325 analysis when studying the human microbiome and virulome. New epidemiological  
326 studies are needed to evaluate the prevalence of potentially pathogenic bacteria  
327 carrying VFs in the healthy human body.

328

329 We hypothesized that the different diseases correspond to a specific virulome,  
330 especially in ACVD and CRC. Initially, the enrichment of genes encoding the type VI  
331 secretion system (T6SS) in *Klebsiella pneumoniae* was characteristic of the ACVD  
332 virulome, which was also discovered and then confirmed by PacBio's single-molecule  
333 real-time (SMRT) sequencing in an independent dataset of the Diabetic  
334 Cardiovascular Complications cohort. T6SS is widely found in gram-negative bacteria,  
335 including *Bacteroidetes* and *Proteobacteria*, and is dedicated to mediating  
336 interbacterial antagonism and niche occupancy<sup>26</sup>. Recently, Verster *et al.* revealed the  
337 role of *Bacteroides fragilis* T6SS in mediating the gut microbe community<sup>27</sup>.  
338 Therefore, we assumed that the existence of T6SS genes might result in the

339 overgrowth of *Klebsiella pneumoniae* in patients with CVD, which can explain why  
340 *Klebsiella pneumoniae* is enriched in CVD cohorts<sup>28,29</sup>. In addition, endotoxin (LPS)  
341 components of *Klebsiella pneumoniae* are another signature of ACVD. As it has been  
342 reported that low-grade chronic inflammation promotes the development of CVD<sup>30</sup>,  
343 the enrichment of LPS may lead to increased inflammation; therefore, it contributes to  
344 the development of ACVD.

345

346 In contrast to ACVD, patients with CRC exhibited an enrichment of genes encoding  
347 the secreted toxin colibactin (*clb*), which has been reported to be enriched in  
348 adenomatous polyposis (FAP)<sup>31</sup> and leads to CRC by inducing oncogenic mutations  
349 of enterocytes<sup>32</sup>. Although previous research has focused on the ability of colibactin  
350 production in *E. coli*, in our virulome analysis, *clb* genes were annotated to the  
351 genome of *Klebsiella pneumoniae*. Since colibactin genes are not present in intestinal  
352 pathogenic *E. coli* strains but are present in *E. coli* strains isolated from human feces<sup>33</sup>,  
353 it is reasonable that *clb* genes in *E. coli* were not found. In addition, the structure of  
354 *clb* is highly conserved among *Enterobacteriaceae*, including *Klebsiella*  
355 *pneumoniae*<sup>34</sup>. Thus, another assumption is that the carcinogenic potential is not  
356 limited to *E. coli* but may expand to other gut bacteria with *clb* gene clusters. Due to  
357 regional, temporal, and spatial differences, it is crucial to have matched healthy  
358 controls when studying the microbiome and virulome. Together, our results suggest  
359 that VF profiles are unique to each disease and that our approach for classifying  
360 virulomes can be applied more broadly.

361

362 Understanding the impact of virulence may provide new treatment options for  
363 microbe-related diseases. The differences in VF profiles across different body sites  
364 and disease types have significant implications for verifying the virulome and finding  
365 new antibacterial treatments. This work also provides a useful reference for future  
366 virulome studies in the human microbiome.

## 367 **Methods**

### 368 **Dataset collection**

369 A total of 1,497 metagenome datasets from habitats within the human skin, oral  
370 cavity, gut, and vagina from the HMP cohort<sup>35</sup> were downloaded from the National  
371 Center for Biotechnology Information (NCBI) Sequence Read Archive (SRA),  
372 <http://www.ncbi.nlm.nih.gov/sra>. Detailed information, including the sample ID,  
373 sequencing platform, read length, read number, data size, and accession numbers for  
374 each dataset, is shown in Supporting Information Table S8. The SRA datasets were  
375 converted to fastq using the fastq-dump module in the NCBI SRA Toolkit. We  
376 collected 2,712 samples from 13 types of diseases, including colorectal carcinoma  
377 (CRC)<sup>36-39</sup>, atherosclerotic cardiovascular disease (ACVD)<sup>40</sup>, inflammatory bowel  
378 disease (IBD)<sup>3,41</sup>, obesity<sup>42</sup>, hypertension<sup>43</sup>, Parkinson's disease (PD)<sup>44</sup>, non-  
379 small cell lung cancer (NSCLC)<sup>45</sup>, hepatocellular carcinoma (HCC)<sup>46</sup>, gastric cancer  
380 (GC)<sup>47</sup>, cirrhosis<sup>48</sup>, melanoma<sup>49,50</sup>, renal cell carcinoma (RCC)<sup>45</sup> and children  
381 with *Mycoplasma pneumoniae* pneumonia (MPP)<sup>24,51</sup>. In total, we analyzed more  
382 than 4,000 metagenomic samples.

### 383 **DNA extraction and whole-genome sequencing.**

384 The total genomic DNA in fecal samples was extracted using a QIAamp PowerFecal  
385 DNA Kit, following the user manual. Total DNA was eluted in 200  $\mu$ L of sterile  
386 water and stored at -20°C until use. A NanoDrop was used to measure the  
387 concentration and purity of the DNAs. Library preparation was carried out following  
388 the recommended protocol from BioScientific's kit. Briefly, approximately 2  $\mu$ g of  
389 DNA from each sample was used for fragmentation by Biorupter (high power: (15 s,  
390 on/90 s, off), six cycles) and end preparation by NEXT flex TM End-Repair. After  
391 PCR amplification (10 cycles), the library was purified using AMPure beads. Qubit  
392 was used to evaluate the quality and quantity of each library. For short-read  
393 sequencing of collected samples, whole-genome sequencing libraries were prepared  
394 using NexteraXT reagents (Illumina) and sequenced on an Illumina HiSeq X Ten  
395 platform. For long-read sequencing, SMRTbell libraries were sequenced on SMRT  
396 Cells (Pacific Biosciences) using magnetic bead loading and P4-C2 or P6-C4  
397 chemistry.

## 398 **Virulence factor database curation**

399 The VFDB (Virulence Factors of Bacterial Pathogens) database<sup>52</sup> is a comprehensive  
400 warehouse for deciphering bacterial pathogenesis. The VFDB (setA) core dataset  
401 comprises genes associated with experimentally verified virulence factors (VFs) for  
402 53 bacterial species. PATRIC does not provide all the details for each VF and is not  
403 responsible for the original annotation. PHI-base focuses on plant pathogens.  
404 Although Victors includes VFs from bacteria, viruses, parasites, and fungi, VFDB  
405 focuses on human bacterial pathogens and contains more bacterial pathogens and  
406 experimentally verified VFs than Victors. This study downloaded the complete  
407 bacterial genomes from the NCBI server (accessed in Feb 2020), including 53 species  
408 of bacterial pathogens. Since the number of available genome sequences is unequal  
409 among different species, we randomly selected 100 genome sequences per species for  
410 ANI analysis and obtained averaged ANI values per species. For ANI calculations,  
411 the query organism's genome is split into 1-kbp fragments, which are then searched  
412 against a reference organism's whole genome. The average sequence identity of all  
413 matches having 60% overall sequence identity over 70% of their length is defined as  
414 the ANI between the two organisms<sup>22</sup>. To identify prophage-encoded VFs, we  
415 downloaded the complete virus genomes from the NCBI server (accessed in June  
416 2020) and performed BLAST searches against the downloaded virus genome using  
417 the VFDB core dataset and the complete bacterial genomes (sequence identity 99%;  
418 coverage 99%).

419

420 We curated the gene annotation of experimentally verified VFs in the VFDB, which  
421 comprises 3,228 experimentally verified gene sequences from 53 species of bacterial  
422 pathogens. We identified VF gene sequences distributed across 74 species using a  
423 nucleotide identity cutoff value of 100% for the BLAST search against the  
424 chromosome sequences in the complete bacterial genomes. We performed  
425 intraspecies ANI analysis for each of the 74 species. The above-identified VF gene  
426 sequences with intraspecies ANI thresholds were used as the seeds to retrieve  
427 additional potential VF gene sequences from the complete bacterial genomes.  
428 Specifically, the complete bacterial genomes were subjected to local BLASTN against  
429 the VF gene sequences to hit potential VF sequences using species-specific sequence  
430 identity (SSI). The filtered hit sequences were extracted, and redundant sequences

431 were removed from the whole database. A total of 56,913 VF gene sequences with  
432 SSI (VFGSSI) serve as a reference sequence for VF gene abundance calculation, of  
433 which 6,584 were mobile VFs and 50,329 were nonmobile VFs. The mobile VF gene  
434 sequences were identified using SSI thresholds for the BLAST search against the  
435 complete bacterial genome plasmid sequences.

#### 436 **Metagenomic analysis**

437 The virulome was determined first by aligning metagenomic reads to the dataset using  
438 BMap with default parameters and then processed using a custom Python script to  
439 filter the mapped reads with the specific sequence identity inferred from the mean  
440 ANI values per species. For gene abundance calculation, the read counts aligned to  
441 this gene were normalized by the gene's length and the total number of reads in the  
442 sample. We manually curated a pathogen list from a previous report<sup>53</sup> to identify  
443 pathogenic and nonpathogenic strains.

444

445 MetaPhlan2<sup>54</sup> was used to perform taxonomic classification and profiling by  
446 mapping metagenomic reads against a library of clade-specific markers. PacBio  
447 sequencing reads were assembled by Canu<sup>55</sup>. VirSorter<sup>56</sup> was used for the  
448 classification of CCs as phages. Categories 1, 2, 4, and 5 were considered phages,  
449 while categories 3 and 6 were excluded because they included false positives.  
450 PlasFlow<sup>57</sup> was used to identify plasmid-like contigs. Gene identification was  
451 performed on assembled sequences using MetaGeneMark<sup>58</sup>. The number of unique  
452 and shared VFs was calculated for the compared sample types, and Venn diagrams  
453 were drawn in Python using the Venn and matplotlib-venn packages.

#### 454 **Statistical analysis**

455 Principal coordinate analysis (PCoA) and nonmetric multidimensional scaling  
456 (NMDS) were performed to evaluate the differences in VF profiles among samples  
457 based on the Bray–Curtis distance of VF relative abundance. Permutational  
458 multivariate analysis of variance (PERMANOVA) between different groups was  
459 performed with adonis in vegan with a similarity index using 9999 permutations.  
460 LefSe<sup>59</sup> analysis was used to identify discriminative VF types between groups.  
461 Diversity and heatmaps were prepared in R with vegan and ggplot2 packages.



## 462 **Competing interests**

463 The authors declare that they have no competing interests.

## 464 **Author contributions**

465 FL and BLZ conceived and designed the study; FL, WTD, YQG, XFS, YX, DMC,  
466 XYF, YF, QX, NL, ZYL, JC, YNW collected and characterized the data; FL  
467 performed the data analysis; FL and WTD drafted the manuscript. All of the authors  
468 read and approved the final manuscript.

## 469 **Abbreviations**

470 **VF**s: virulence factors; **ACVD**: atherosclerotic cardiovascular disease; **IBD**:  
471 inflammatory bowel disease; **CRC**: colorectal carcinoma; **NSCLC**: non-  
472 small cell lung cancer; **HCC**: hepatocellular carcinoma; **GC**: gastric cancer; **PD**:  
473 Parkinson's disease; **RCC**: renal cell carcinoma; **PCoA**: principal coordinate analysis;  
474 **NMDS**: nonmetric multidimensional scaling.

## 475 **Acknowledgements**

476 This work was supported in part by the Strategic Priority Research Program of The  
477 Chinese Academy of Sciences (XDB29020203) and the National Key R&D Program  
478 of China (2018YFC1603903 and 2018YFC1603803-2).

## 479 **References**

- 480 1 Turnbaugh, P. J. *et al.* A core gut microbiome in obese and lean twins. *Nature*  
481 **457**, 480-484, doi:10.1038/nature07540 (2009).
- 482 2 Qin, J. *et al.* A metagenome-wide association study of gut microbiota in type 2  
483 diabetes. *Nature* **490**, 55-60, doi:10.1038/nature11450 (2012).
- 484 3 Nielsen, H. B. *et al.* Identification and assembly of genomes and genetic  
485 elements in complex metagenomic samples without using reference genomes.  
486 *Nat Biotechnol* **32**, 822-828, doi:10.1038/nbt.2939 (2014).
- 487 4 Rooks, M. G. & Garrett, W. S. Gut microbiota, metabolites and host  
488 immunity. *Nat Rev Immunol* **16**, 341-352, doi:10.1038/nri.2016.42 (2016).
- 489 5 Kamada, N. *et al.* Regulated virulence controls the ability of a pathogen to  
490 compete with the gut microbiota. *Science* **336**, 1325-1329,  
491 doi:10.1126/science.1222195 (2012).
- 492 6 Brown, S. P., Cornforth, D. M. & Mideo, N. Evolution of virulence in  
493 opportunistic pathogens: generalism, plasticity, and control. *Trends Microbiol*  
494 **20**, 336-342, doi:10.1016/j.tim.2012.04.005 (2012).

- 495 7 Falkow, S. Molecular Koch's postulates applied to bacterial pathogenicity--a  
496 personal recollection 15 years later. *Nature reviews. Microbiology* **2**, 67-72  
497 (2004).
- 498 8 Wu, S. *et al.* A human colonic commensal promotes colon tumorigenesis via  
499 activation of T helper type 17 T cell responses. *Nat Med* **15**, 1016-1022,  
500 doi:10.1038/nm.2015 (2009).
- 501 9 Pleguezuelos-Manzano, C. *et al.* Mutational signature in colorectal cancer  
502 caused by genotoxic pks E. coli. *Nature* **580**, 269-273, doi:10.1038/s41586-  
503 020-2080-8 (2020).
- 504 10 Arthur, J. C. *et al.* Intestinal inflammation targets cancer-inducing activity of  
505 the microbiota. *Science* **338**, 120-123, doi:10.1126/science.1224820 (2012).
- 506 11 Byrd, A. L. & Segre, J. A. Infectious disease. Adapting Koch's postulates.  
507 *Science* **351**, 224-226, doi:10.1126/science.aad6753 (2016).
- 508 12 Qin, J. *et al.* A human gut microbial gene catalogue established by  
509 metagenomic sequencing. *Nature* **464**, 59-65, doi:10.1038/nature08821  
510 (2010).
- 511 13 Chen, L. *et al.* VFDB: a reference database for bacterial virulence factors.  
512 *Nucleic acids research* **33**, D325-328, doi:10.1093/nar/gki008 (2005).
- 513 14 Sayers, S. *et al.* Victors: a web-based knowledge base of virulence factors in  
514 human and animal pathogens. *Nucleic acids research* **47**, D693-D700,  
515 doi:10.1093/nar/gky999 (2019).
- 516 15 Wattam, A. R. *et al.* Improvements to PATRIC, the all-bacterial  
517 Bioinformatics Database and Analysis Resource Center. *Nucleic Acids Res* **45**,  
518 D535-D542, doi:10.1093/nar/gkw1017 (2017).
- 519 16 Urban, M. *et al.* PHI-base: the pathogen-host interactions database. *Nucleic*  
520 *Acids Res* **48**, D613-D620, doi:10.1093/nar/gkz904 (2020).
- 521 17 Martínez-García, P. M., Ramos, C. & Rodríguez-Palenzuela, P. T346Hunter: a  
522 novel web-based tool for the prediction of type III, type IV and type VI  
523 secretion systems in bacterial genomes. *PloS one* **10**, e0119317,  
524 doi:10.1371/journal.pone.0119317 (2015).
- 525 18 Zheng, D., Pang, G., Liu, B., Chen, L. & Yang, J. Learning transferable deep  
526 convolutional neural networks for the classification of bacterial virulence  
527 factors. *Bioinformatics* (Oxford, England),  
528 doi:10.1093/bioinformatics/btaa230 (2020).
- 529 19 Liu, B., Zheng, D., Jin, Q., Chen, L. & Yang, J. VFDB 2019: a comparative  
530 pathogenomic platform with an interactive web interface. *Nucleic acids*  
531 *research* **47**, D687-D692, doi:10.1093/nar/gky1080 (2019).
- 532 20 Cimermanic, P. *et al.* Insights into secondary metabolism from a global  
533 analysis of prokaryotic biosynthetic gene clusters. *Cell* **158**, 412-421,  
534 doi:10.1016/j.cell.2014.06.034 (2014).
- 535 21 Theuretzbacher, U. & Piddock, L. J. V. Non-traditional Antibacterial  
536 Therapeutic Options and Challenges. *Cell Host Microbe* **26**, 61-72,  
537 doi:10.1016/j.chom.2019.06.004 (2019).
- 538 22 Goris, J. *et al.* DNA-DNA hybridization values and their relationship to  
539 whole-genome sequence similarities. *International journal of systematic and*  
540 *evolutionary microbiology* **57**, 81-91, doi:10.1099/ijs.0.64483-0 (2007).
- 541 23 Galan, J. E. & Waksman, G. Protein-Injection Machines in Bacteria. *Cell* **172**,  
542 1306-1318, doi:10.1016/j.cell.2018.01.034 (2018).

- 543 24 Dai, W. *et al.* An integrated respiratory microbial gene catalogue to better  
544 understand the microbial aetiology of *Mycoplasma pneumoniae* pneumonia.  
545 *GigaScience* **8**, doi:10.1093/gigascience/giz093 (2019).
- 546 25 Li, J. *et al.* VRprofile: gene-cluster-detection-based profiling of virulence and  
547 antibiotic resistance traits encoded within genome sequences of pathogenic  
548 bacteria. *Brief Bioinform* **19**, 566-574, doi:10.1093/bib/bbw141 (2018).
- 549 26 Russell, A. B. *et al.* A type VI secretion-related pathway in *Bacteroidetes*  
550 mediates interbacterial antagonism. *Cell Host Microbe* **16**, 227-236,  
551 doi:10.1016/j.chom.2014.07.007 (2014).
- 552 27 Verster, A. J. *et al.* The Landscape of Type VI Secretion across Human Gut  
553 Microbiomes Reveals Its Role in Community Composition. *Cell Host Microbe*  
554 **22**, 411-419 e414, doi:10.1016/j.chom.2017.08.010 (2017).
- 555 28 Liu, H. *et al.* Alterations in the gut microbiome and metabolism with coronary  
556 artery disease severity. *Microbiome* **7**, 68, doi:10.1186/s40168-019-0683-9  
557 (2019).
- 558 29 Ott, S. J. *et al.* Detection of diverse bacterial signatures in atherosclerotic  
559 lesions of patients with coronary heart disease. *Circulation* **113**, 929-937,  
560 doi:10.1161/CIRCULATIONAHA.105.579979 (2006).
- 561 30 Livshits, G. & Kalinkovich, A. Inflammaging as a common ground for the  
562 development and maintenance of sarcopenia, obesity, cardiomyopathy and  
563 dysbiosis. *Ageing Res Rev* **56**, 100980, doi:10.1016/j.arr.2019.100980 (2019).
- 564 31 Dejea, C. M. *et al.* Patients with familial adenomatous polyposis harbor  
565 colonic biofilms containing tumorigenic bacteria. *Science* **359**, 592-597,  
566 doi:10.1126/science.aah3648 (2018).
- 567 32 Pleguezuelos-Manzano, C. *et al.* Mutational signature in colorectal cancer  
568 caused by genotoxic pks(+) *E. coli*. *Nature* **580**, 269-273, doi:10.1038/s41586-  
569 020-2080-8 (2020).
- 570 33 Nougayrede, J. P. *et al.* *Escherichia coli* induces DNA double-strand breaks in  
571 eukaryotic cells. *Science* **313**, 848-851, doi:10.1126/science.1127059 (2006).
- 572 34 Putze, J. *et al.* Genetic structure and distribution of the colibactin genomic  
573 island among members of the family Enterobacteriaceae. *Infect Immun* **77**,  
574 4696-4703, doi:10.1128/IAI.00522-09 (2009).
- 575 35 Lloyd-Price, J. *et al.* Strains, functions and dynamics in the expanded Human  
576 Microbiome Project. *Nature* **550**, 61-66, doi:10.1038/nature23889 (2017).
- 577 36 Feng, Q. *et al.* Gut microbiome development along the colorectal adenoma-  
578 carcinoma sequence. *Nat Commun* **6**, 6528, doi:10.1038/ncomms7528 (2015).
- 579 37 Vogtmann, E. *et al.* Colorectal Cancer and the Human Gut Microbiome:  
580 Reproducibility with Whole-Genome Shotgun Sequencing. *PLoS ONE* **11**,  
581 e0155362, doi:10.1371/journal.pone.0155362 (2016).
- 582 38 Wirbel, J. *et al.* Meta-analysis of fecal metagenomes reveals global microbial  
583 signatures that are specific for colorectal cancer. *Nat Med* **25**, 679-689,  
584 doi:10.1038/s41591-019-0406-6 (2019).
- 585 39 Yu, J. *et al.* Metagenomic analysis of faecal microbiome as a tool towards  
586 targeted non-invasive biomarkers for colorectal cancer. *Gut* **66**, 70-78,  
587 doi:10.1136/gutjnl-2015-309800 (2017).
- 588 40 Jie, Z. *et al.* The gut microbiome in atherosclerotic cardiovascular disease. *Nat*  
589 *Commun* **8**, 845, doi:10.1038/s41467-017-00900-1 (2017).
- 590 41 Franzosa, E. A. *et al.* Gut microbiome structure and metabolic activity in  
591 inflammatory bowel disease. *Nat Microbiol* **4**, 293-305, doi:10.1038/s41564-  
592 018-0306-4 (2019).

- 593 42 Le Chatelier, E. *et al.* Richness of human gut microbiome correlates with  
594 metabolic markers. *Nature* **500**, 541-546, doi:10.1038/nature12506 (2013).
- 595 43 Li, J. *et al.* Gut microbiota dysbiosis contributes to the development of  
596 hypertension. *Microbiome* **5**, 14, doi:10.1186/s40168-016-0222-x (2017).
- 597 44 Bedarf, J. R. *et al.* Functional implications of microbial and viral gut  
598 metagenome changes in early stage L-DOPA-naïve Parkinson's disease  
599 patients. *Genome Med* **9**, 39, doi:10.1186/s13073-017-0428-y (2017).
- 600 45 Routy, B. *et al.* Gut microbiome influences efficacy of PD-1-based  
601 immunotherapy against epithelial tumors. *Science* **359**, 91-97,  
602 doi:10.1126/science.aan3706 (2018).
- 603 46 Zheng, Y. *et al.* Gut microbiome affects the response to anti-PD-1  
604 immunotherapy in patients with hepatocellular carcinoma. *J Immunother*  
605 *Cancer* **7**, 193, doi:10.1186/s40425-019-0650-9 (2019).
- 606 47 Erawijantari, P. P. *et al.* Influence of gastrectomy for gastric cancer treatment  
607 on faecal microbiome and metabolome profiles. *Gut* **69**, 1404-1415,  
608 doi:10.1136/gutjnl-2019-319188 (2020).
- 609 48 Qin, N. *et al.* Alterations of the human gut microbiome in liver cirrhosis.  
610 *Nature* **513**, 59-64, doi:10.1038/nature13568 (2014).
- 611 49 Matson, V. *et al.* The commensal microbiome is associated with anti-PD-1  
612 efficacy in metastatic melanoma patients. *Science* **359**, 104-108,  
613 doi:10.1126/science.aao3290 (2018).
- 614 50 Frankel, A. E. *et al.* Metagenomic Shotgun Sequencing and Unbiased  
615 Metabolomic Profiling Identify Specific Human Gut Microbiota and  
616 Metabolites Associated with Immune Checkpoint Therapy Efficacy in  
617 Melanoma Patients. *Neoplasia* **19**, 848-855, doi:10.1016/j.neo.2017.08.004  
618 (2017).
- 619 51 Liu, F., Wang, Y., Gao, G. F. & Zhu, B. Metagenomic analysis reveals the  
620 abundance and diversity of ARGs in children's respiratory tract microbiomes.  
621 *The Journal of infection* **80**, 232-254, doi:10.1016/j.jinf.2019.11.002 (2020).
- 622 52 Liu, B., Zheng, D., Jin, Q., Chen, L. & Yang, J. VFDB 2019: a comparative  
623 pathogenomic platform with an interactive web interface. *Nucleic acids*  
624 *research* **47**, D687-D692, doi:10.1093/nar/gky1080 (2019).
- 625 53 Blauwkamp, T. A. *et al.* Analytical and clinical validation of a microbial cell-  
626 free DNA sequencing test for infectious disease. *Nat Microbiol* **4**, 663-674,  
627 doi:10.1038/s41564-018-0349-6 (2019).
- 628 54 Truong, D. T. *et al.* MetaPhlan2 for enhanced metagenomic taxonomic  
629 profiling. *Nature methods* **12**, 902-903, doi:10.1038/nmeth.3589 (2015).
- 630 55 Koren, S. *et al.* Canu: scalable and accurate long-read assembly via adaptive  
631 k-mer weighting and repeat separation. *Genome research* **27**, 722-736,  
632 doi:10.1101/gr.215087.116 (2017).
- 633 56 Roux, S., Enault, F., Hurwitz, B. L. & Sullivan, M. B. VirSorter: mining viral  
634 signal from microbial genomic data. *PeerJ* **3**, e985, doi:10.7717/peerj.985  
635 (2015).
- 636 57 Krawczyk, P. S., Lipinski, L. & Dziembowski, A. PlasFlow: predicting  
637 plasmid sequences in metagenomic data using genome signatures. *Nucleic*  
638 *acids research* **46**, e35, doi:10.1093/nar/gkx1321 (2018).
- 639 58 Zhu, W., Lomsadze, A. & Borodovsky, M. Ab initio gene identification in  
640 metagenomic sequences. *Nucleic acids research* **38**, e132,  
641 doi:10.1093/nar/gkq275 (2010).

642 59 Segata, N. *et al.* Metagenomic biomarker discovery and explanation. *Genome*  
643 *biology* **12**, R60, doi:10.1186/gb-2011-12-6-r60 (2011).  
644

## 645 **Figures**

646 **Figure 1. Comparison of the intraspecies whole-genome average nucleotide**  
647 **identity and accuracy of different thresholds for VF identification.** (A) Barplot  
648 depicting the average nucleotide identity values of the 53 species of bacterial  
649 pathogens. (B) Barplot showing the number of pathogenic and nonpathogenic strains  
650 that hit at least one VF under different cutoffs. (C) Precision and recall graph for  
651 pathogenic and nonpathogenic strain identification under different cutoffs. We  
652 performed intraspecies ANI analysis for each of the 53 species. Figure 1A shows that  
653 the ANI values range from 85.3% (*Pseudomonas stutzeri*) to 99.9% (*Bordetella*  
654 *pertussis*) for different species. We performed BLAST searches against the  
655 chromosome sequences in the complete bacterial genomes using species-specific  
656 sequence identity (SSI) thresholds and different nucleotide identity cutoffs ranging  
657 from 99% to 90%. In this experiment, SSI achieved almost the same high precision  
658 as 100% and 99% but at a markedly higher recall (Figure 1C). SSI performed the  
659 best in accuracy and F1 scores since it identified high TPs and did not introduce  
660 many FPs. (D) Schematic representation of the curation of the VF dataset.

661 **Figure 2. Different body sites have a distinct virulome.** (A) Number of samples  
662 analyzed in the study. (B) Boxplot of the Shannon diversity indexes of all samples  
663 from different body sites based on VF abundance profiles. \* $p < 0.05$ , \*\* $p < 0.01$ , \*\*\* $p$   
664  $< 0.001$ , \*\*\*\* $p < 0.0001$ , Wilcoxon rank-sum test. (C) Principal coordinate analysis of  
665 Bray-Curtis dissimilarities showing the virulome. The first principal coordinate is  
666 shown by the x-axis, and the second principal coordinate is shown by the y-axis. (D)  
667 Comparison of the mean VF abundance. The centerline represents the median for  
668 each boxplot, and the boxes correspond to the 25th and 75th percentiles; all data  
669 points are shown. Hierarchical clustering of the prevalence of 106 VF genes (E) and  
670 15 VF functional categories (F) that were hit in one of the body sites and are present  
671 in 20% or more of the samples in at least one body site. For the virulome analysis,  
672 the mean VF abundances in oral samples were significantly higher than those in  
673 other body sites. As expected, the vagina had the lowest total VF abundance.  
674 Additionally, the Shannon diversity values of VFs in the oral cavity and gut were  
675 significantly higher than those of VFs in other body sites.

676 **Figure 3. Different disease types have a distinct virulome.** (A) Number of  
677 samples analyzed in the study. Dashes indicate data not available. ACVD,  
678 atherosclerotic cardiovascular disease; IBD, inflammatory bowel disease; CRC,

679 colorectal carcinoma; NSCLC, non-small cell lung cancer; HCC,  
680 hepatocellular carcinoma; GC, gastric cancer; PD, Parkinson's disease; RCC,  
681 renal cell carcinoma. (B) Boxplot of the Shannon diversity indexes of all samples  
682 from different types of diseases based on VF abundance profiles. (C) Hierarchical  
683 clustering of the prevalence of VF categories that were hits in one of the disease  
684 types and were present in 20% or more of the samples in at least one of the disease  
685 types. (D) Hierarchical clustering of the mean abundance of representative VFs for  
686 each type of disease. The top 10% (referring to the ratio of VF type numbers) of the  
687 most abundant VF types in each type of disease were considered the representative  
688 VFs.

689 **Figure 4. Patients with type 2 diabetes with cardiovascular diseases**  
690 **(T2D+CVD) had a more diverse virulome.** (A) Boxplot of the number of VF genes  
691 present in each sample. (B) Boxplot of the Shannon diversity indexes of all samples  
692 based on the virulome. \* $p < 0.05$ , \*\* $p < 0.01$ , \*\*\* $p < 0.001$ , \*\*\*\* $p < 0.0001$ , Wilcoxon  
693 rank-sum test. (C) Comparison of the mean VF abundance. For each boxplot, the  
694 centerline represents the median, and the boxes correspond to the 25th and 75th  
695 percentiles; all data points are shown. (D) NMDS of Bray-Curtis dissimilarities  
696 showing the virulome. Bray-Curtis dissimilarities were calculated from the relative VF  
697 abundance profiles. The x-axis shows the first principal coordinate, and the y-axis  
698 shows the second principal coordinate. (E) Histogram of the LDA scores ( $\log_{10}$ )  
699 computed for VFs with differential abundance in the healthy, T2D, and T2D+CVD  
700 subjects. The LDA scores indicated that the abundances of autotransporter-related  
701 VFs were much more enriched in T2D, while adherence and T6SS were much more  
702 enriched in T2D+CVD. Most of the enriched VFs in T2D and T2D+CVD were derived  
703 from *Escherichia coli* and *Klebsiella pneumoniae*. (F) Network analysis  
704 demonstrating the co-occurrence patterns between VFs. The nodes are colored  
705 according to the VF genes, with each node representing a VF subtype. The size of  
706 each node is proportional to its number of connections. An edge is a strong ( $q > 0.6$ )  
707 and significant ( $P$ -value  $< 0.01$ ) connection between nodes.

708 **Figure 5. PacBio long-read sequencing confirmation of VF genes that exist in**  
709 **the contigs of fecal samples.** (A) Heatmap shows the VF distribution among the 9  
710 human gut samples using SSI. The mean numbers of VFs in T2D+CVD were  
711 significantly higher than those in the other two groups. Most of the VFs were derived  
712 from *Escherichia coli* and *Klebsiella pneumoniae*, consistent with Illumina sequencing  
713 observations. (B) BLAST ring image of the two complete genomes of *Klebsiella*

714 *pneumoniae*. The *Klebsiella pneumoniae* strain KP3037 was used as the reference  
715 in the outermost ring. The two innermost rings represent the GC content of that area  
716 and the GC skew, respectively. The saturation of the color in these rings indicates  
717 identity by BLAST hit.



## 718 **Additional Files**

### 719 **Additional file 1**

720 **Figure S1. Schematic representation of the virulome analysis pipeline.** We  
721 curated the gene annotation of experimentally verified VFs in the VFDB, which  
722 comprises 3,228 experimentally verified gene sequences from 53 species of bacterial  
723 pathogens. We identified VF gene sequences distributed across 74 species using a  
724 nucleotide identity cutoff value of 100% for the BLAST search against the  
725 chromosome sequences in the complete bacterial genomes. We downloaded the  
726 complete bacterial genomes from the NCBI server (accessed on Feb 2020), including  
727 74 species of bacterial pathogens. We performed intraspecies ANI analysis for each  
728 of the 74 species. The above-identified VF gene sequences with intraspecies ANI  
729 thresholds were used as the seeds to retrieve additional potential VF gene  
730 sequences from the complete bacterial genomes. Specifically, the complete bacterial  
731 genomes were subjected to local BLASTN against the VF gene sequences to hit  
732 potential VF sequences using species-specific sequence identity (SSI). The filtered  
733 hit sequences were extracted, and redundant sequences were removed from the  
734 whole database. The final VF gene sequences with SSI serve as a reference  
735 sequence for VF gene abundance calculation.

736 **Figure S2. Different body sites have distinct microbiomes.** (A) Boxplot of the  
737 Shannon diversity indexes of all samples from different body sites based  
738 on relative species abundance profiles. \* $p < 0.05$ , \*\* $p < 0.01$ , \*\*\* $p < 0.001$ , \*\*\*\* $p <$   
739  $0.0001$ , Wilcoxon rank-sum test. (B) Principal coordinate analysis of Bray-Curtis  
740 dissimilarities showing the microbiome. Bray-Curtis dissimilarities were calculated  
741 from the relative species abundance profiles. The x-axis shows the first principal  
742 coordinate, and the y-axis shows the second principal coordinate.

743 **Figure S3. Comparison of mean VF abundance in the samples at six major**  
744 **body sites.** For each boxplot, the centerline represents the median, and the boxes  
745 correspond to the 25th and 75th percentiles; all data points are shown.

746 **Figure S4. Histogram of the LDA scores (log<sub>10</sub>) computed for VFs with**  
747 **differential abundance in different body sites.**

748 **Figure S5. Venn diagram showing the number of shared and unique VF genes**  
749 **among different body sites.** (A) Venn diagram of the four body sites. (B) Venn

750 diagram of each pair of body sites. The number of shared and unique VF genes is  
751 shown. The shared and unique VF genes among the groups were investigated. We  
752 found that a total of 200 VF genes were shared among body sites. Interestingly, the  
753 oral cavity and skin shared more VFs (689 types) than those shared between the gut  
754 and oral cavity (443 types) or between the gut and skin (444 types).

755 **Figure S6. VF gene profiles were sex-specific and relatively stable over time.**

756 Comparison of the total VF abundance between males and females in four major  
757 body habitats (A) and six major body sites (B). Comparison of the total VF  
758 abundance among samples from the same individuals over time in four major body  
759 habitats (C) and six major body sites (D). In the boxplots, the upper hinge represents  
760 the 75% quantile, the lower hinge represents the 25% quantile, and the centerline  
761 represents the median. Compared to men, women showed a higher VF abundance in  
762 the skin and gut (ANOVA,  $p < 0.05$ ). Specifically, females had higher VF abundance  
763 in the anterior nares. The availability of longitudinal samples of different body sites  
764 over two years from individuals who did not take antimicrobial drugs afforded us the  
765 ability to investigate the stability of virulomes over time. There was no significant  
766 difference among samples from the same individuals except for the vagina, verifying  
767 that virulomes remained stable over a long period in different body habitats.

768 **Figure S7. Histogram of the LDA scores (log<sub>10</sub>) computed for VFs with**  
769 **differential abundance between males and females in the gut.**

770 **Figure S8. Histogram of the LDA scores (log<sub>10</sub>) computed for VFs with**  
771 **differential abundance between males and females in the oral cavity.**

772 **Figure S9. Histogram of the LDA scores (log<sub>10</sub>) computed for VFs with**  
773 **differential abundance between males and females in the skin.**

774 **Figure S10. Hierarchical clustering of the mean abundance of VFs encoding**  
775 **secretion systems for each type of disease.**

776 **Figure S11. Hierarchical clustering of the mean abundance of VFs encoding**  
777 **effectors of secretion systems for each type of disease.**

778 **Figure S12. Richness, Simpson, Shannon, and evenness diversity of VFs in**  
779 **ACVD samples.**

780 **Figure S13. Richness, Simpson, Shannon, and evenness diversity of VFs in**  
781 **CRC samples.**

782 **Figure S14. Richness, Simpson, Shannon, and evenness diversity of VFs in LC**  
783 **samples.**

784 **Figure S15. Histogram of the LDA scores (log10) computed for VFs with**  
785 **differential abundance in ACVD samples.**

786 **Figure S16. Richness, Simpson, Shannon, and evenness diversity of VFs in the**  
787 **children's respiratory tract metagenome samples.**

788 **Figure S17. Histogram of the LDA scores (log10) computed for VFs with**  
789 **differential abundance in the children's respiratory tract metagenome samples.**

790 **Figure S18. Comparison of mobile and intrinsic VF abundance. "Intrinsic VFs"**  
791 **are VFs located only on the bacterial chromosome. "Mobile VFs" are VFs**  
792 **located on plasmids. Each dot represents a metagenome sample. For each boxplot,**  
793 **the centerline represents the median, and the boxes correspond to the 25th and 75th**  
794 **percentiles; all data points are shown.**

795 **Figure S19. Richness, Simpson, Shannon, and evenness diversity of VFs in**  
796 **GDM samples.**

797 **Additional file 2**

798 **Table S1. The number of VF gene sequences from each species in the dataset.**

799 **Table S2. Distribution of the number of sequences in the VF categories in the**  
800 **dataset.**

801 **Table S3. List of pathogens that can cause infections of the gastrointestinal**  
802 **tract and the diseases they cause.**

803 **Table S4. List of pathogens that cannot cause infections of the gastrointestinal**  
804 **tract and the diseases they cause.**

805 **Table S5. The top 10% (referring to the ratio of VF type numbers) of the most**  
806 **abundant VF types in each type of disease, which were considered the**  
807 **representative VFs, are summarized.**

808 **Table S6. The Illumina short-read sequencing statistics.**

809 **Table S7. The PacBio long-read sequencing statistics.**

810 **Table S8. Detailed information on 1,497 metagenome datasets from habitats**  
811 **within the human skin, oral cavity, gut, and vagina from the HMP cohort is**  
812 **summarized.**

A

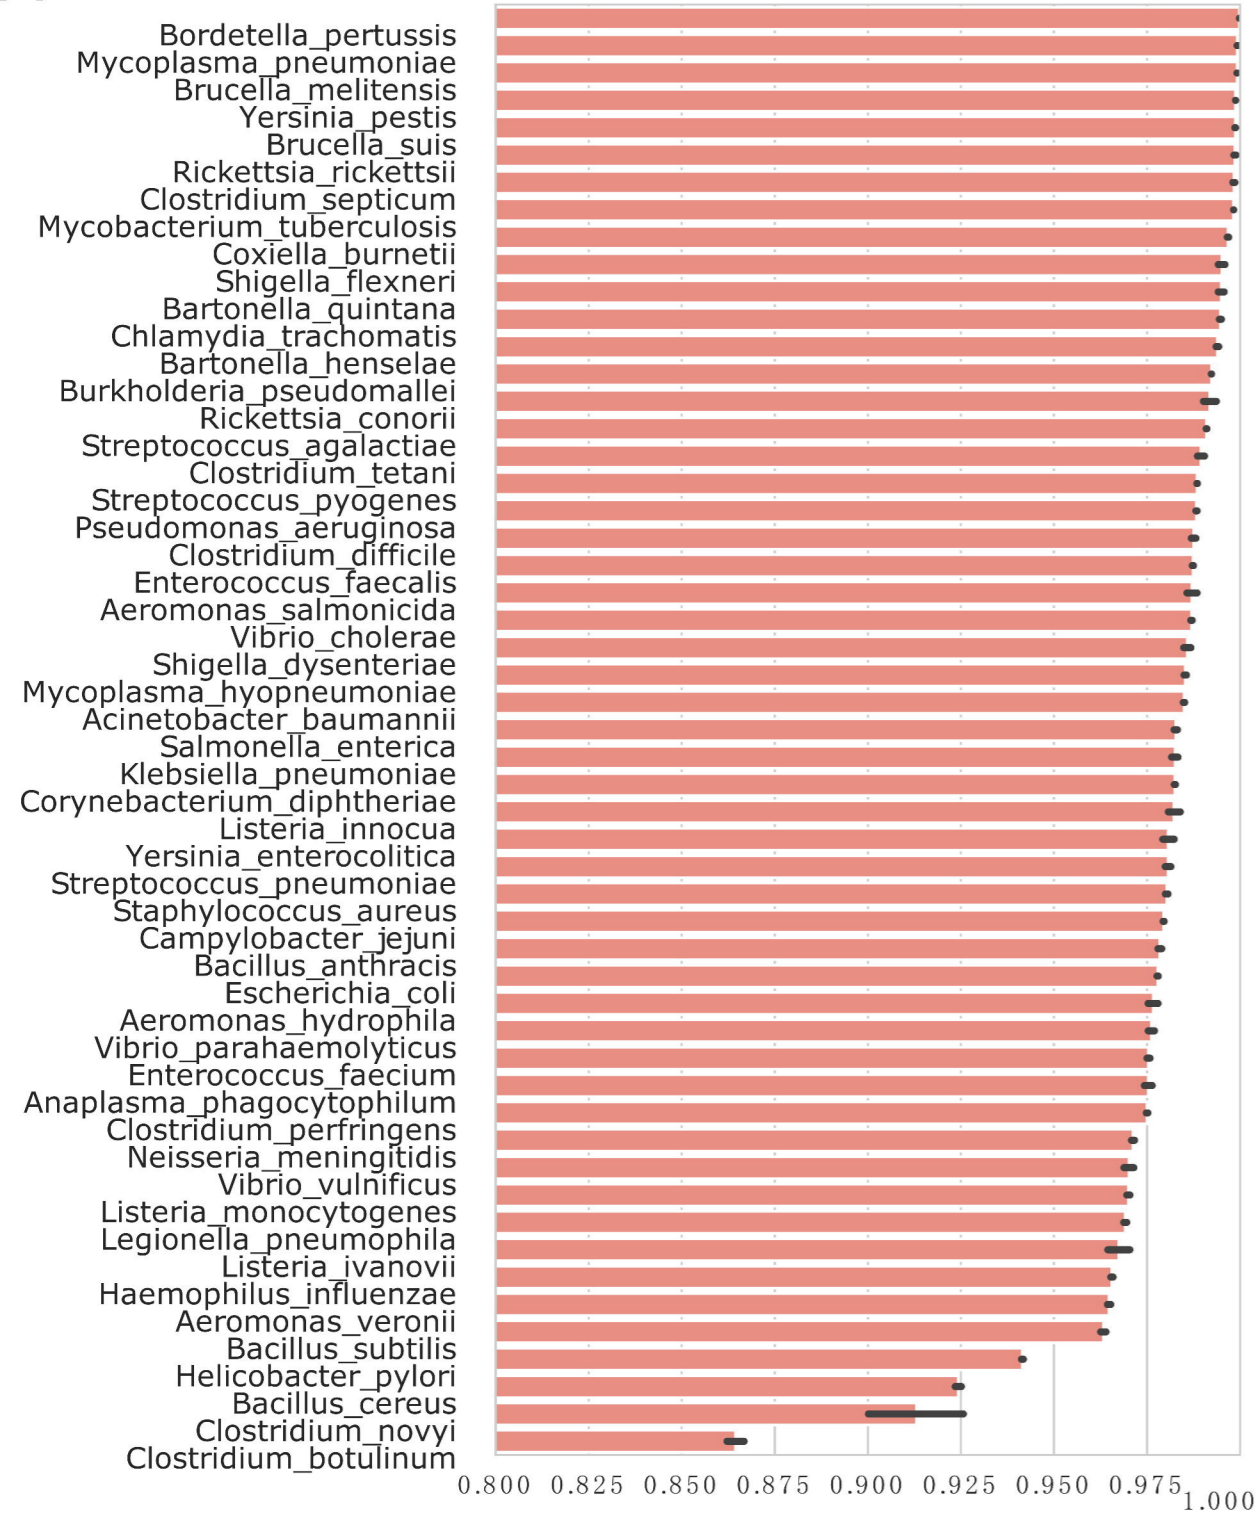

B

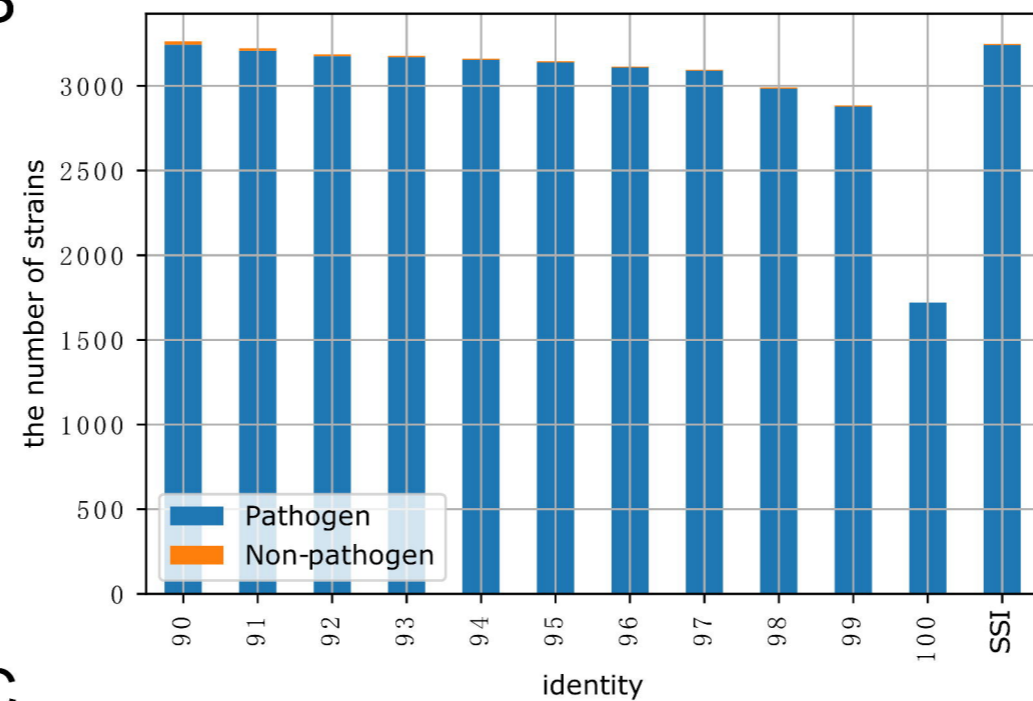

C

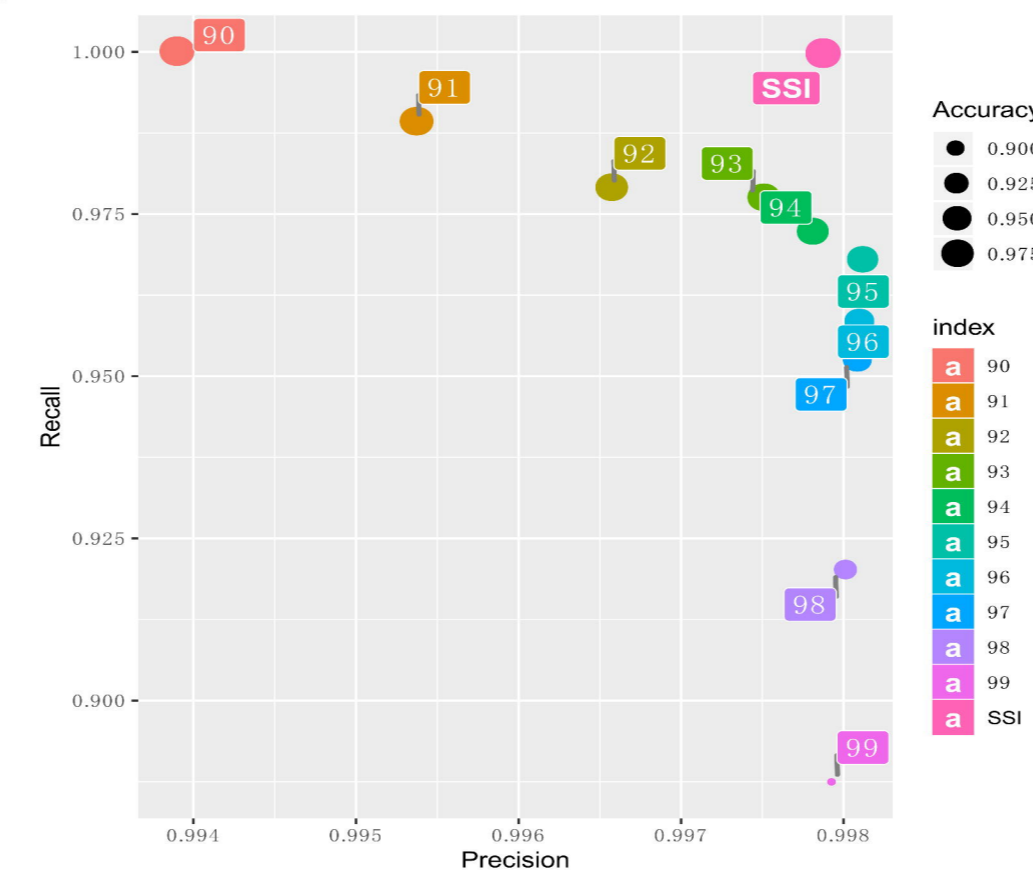

D

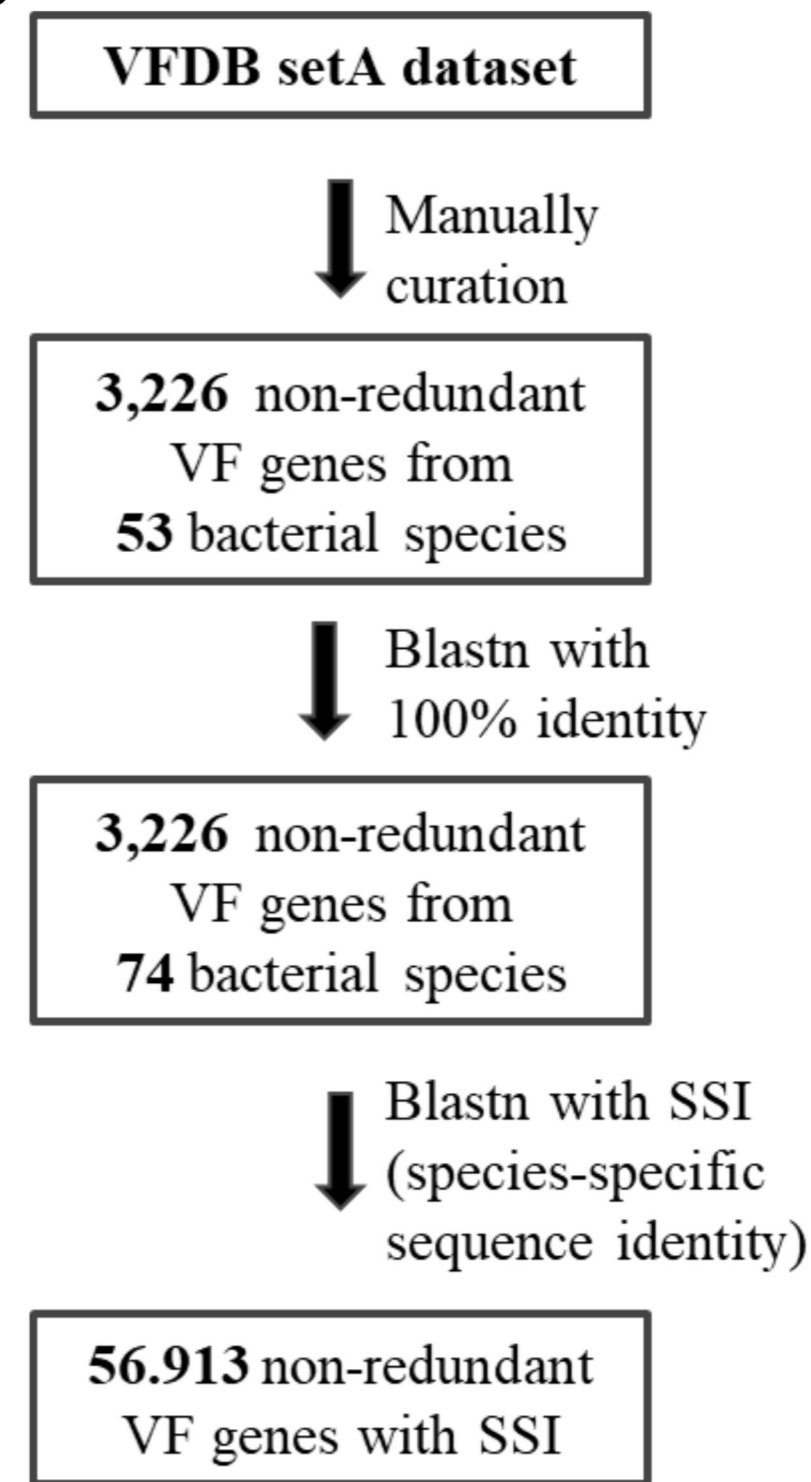

**A**

| Body site | Gender | # samples |
|-----------|--------|-----------|
| Gut       | Female | 124       |
|           | Male   | 147       |
| Oral      | Female | 383       |
|           | Male   | 429       |
| Skin      | Female | 81        |
|           | Male   | 132       |
| Vaginal   | Female | 115       |
| Total     |        | 1497      |

**B**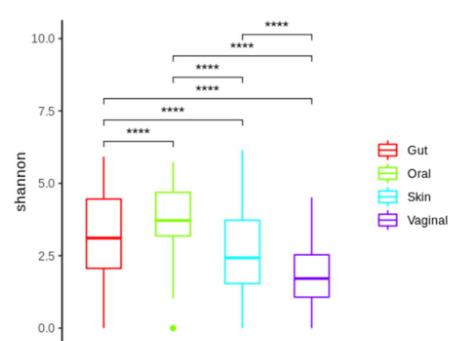**C**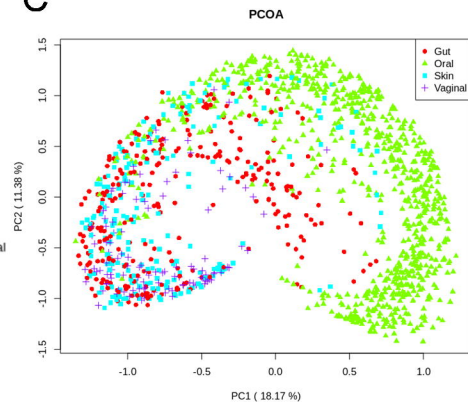**D**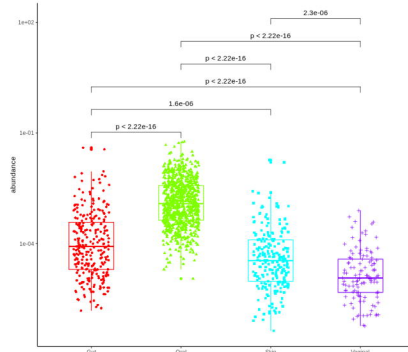**E**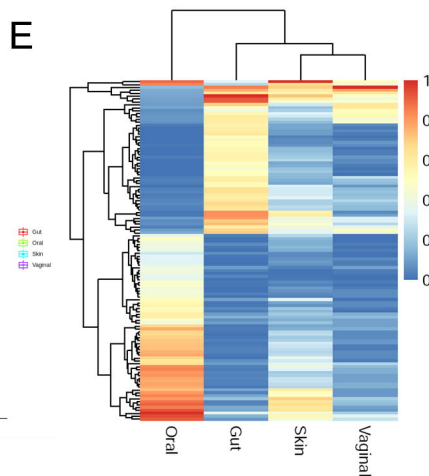**F**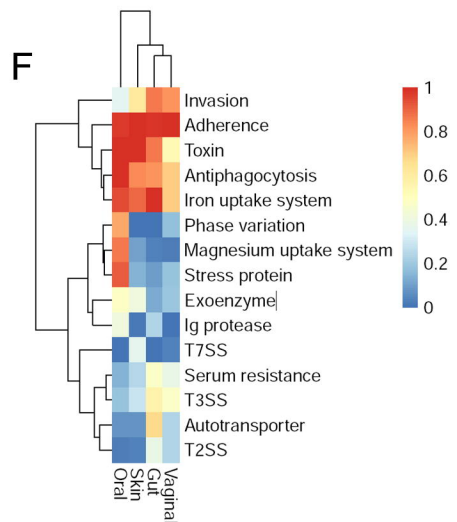

A

| Type of Disease | Normal:<br># samples<br>(# centers) | Disease:<br># samples<br>(# centers) |
|-----------------|-------------------------------------|--------------------------------------|
| IBD             | 127 (2)                             | 312 (2)                              |
| CRC             | 229 (4)                             | 232 (4)                              |
| ACVD            | 171                                 | 214                                  |
| Obesity         | 123                                 | 169                                  |
| NSCLC           | —                                   | 118                                  |
| Cirrhosis       | 123                                 | 114                                  |
| RCC             | —                                   | 101                                  |
| Hypertension    | 41                                  | 98                                   |
| Melanoma        | —                                   | 79 (2)                               |
| Pneumonia       | 171                                 | 76                                   |
| GC              | 50                                  | 56                                   |
| HCC             | —                                   | 50                                   |
| PD              | 27                                  | 31                                   |
| <b>Total</b>    | 2712                                |                                      |

B

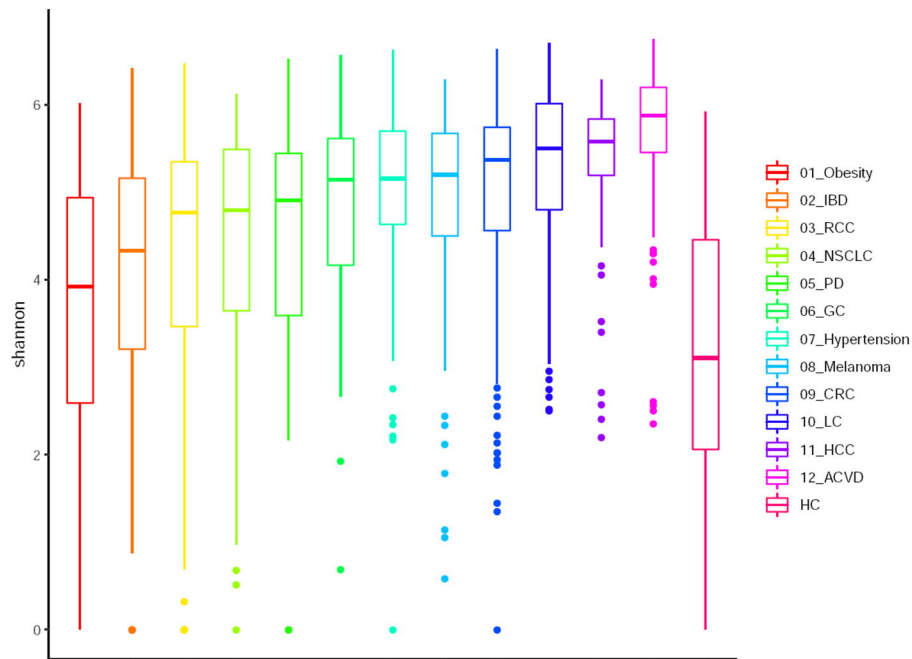

C

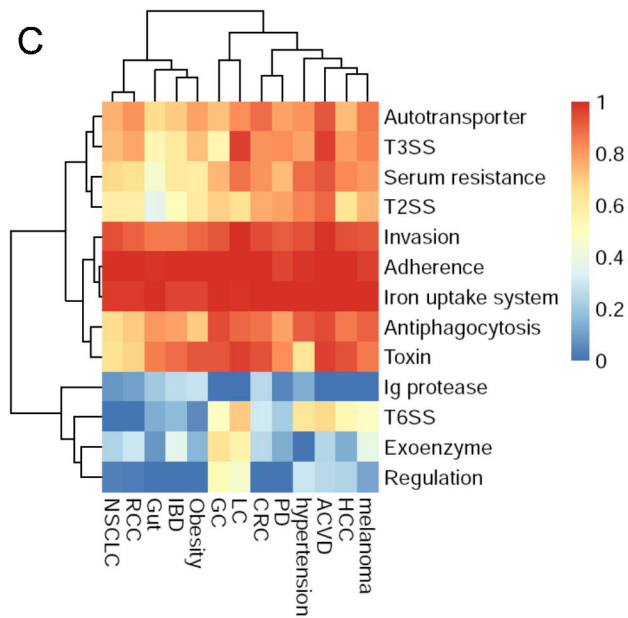

D

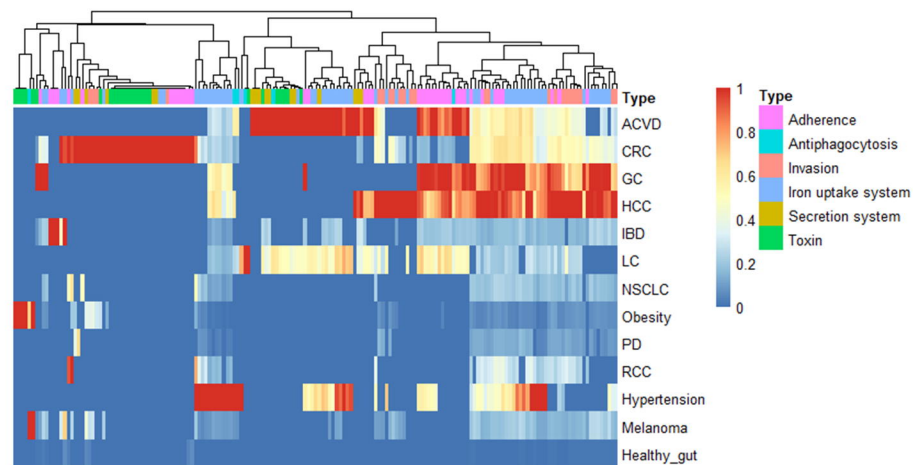

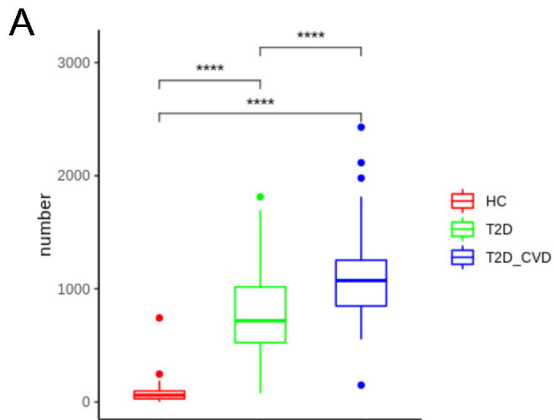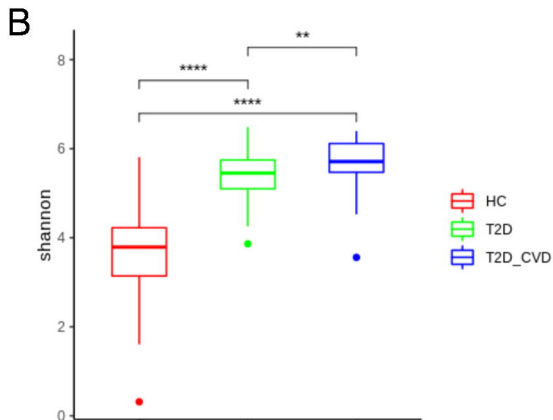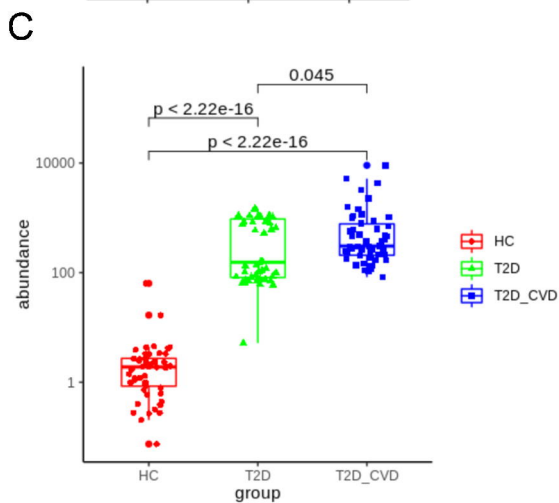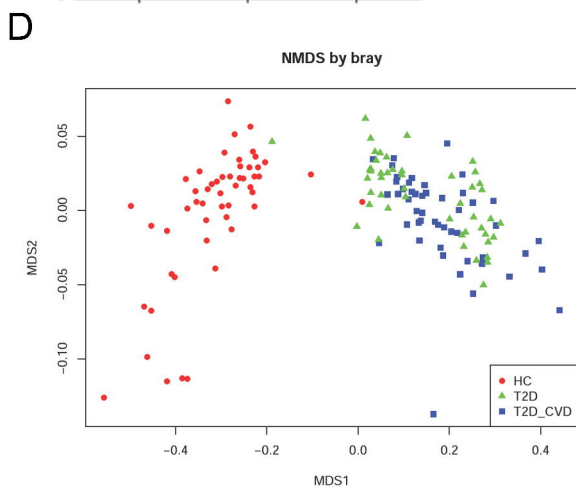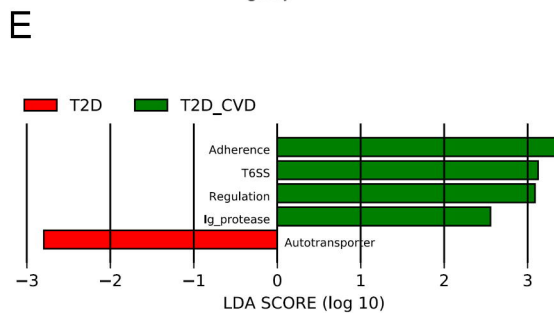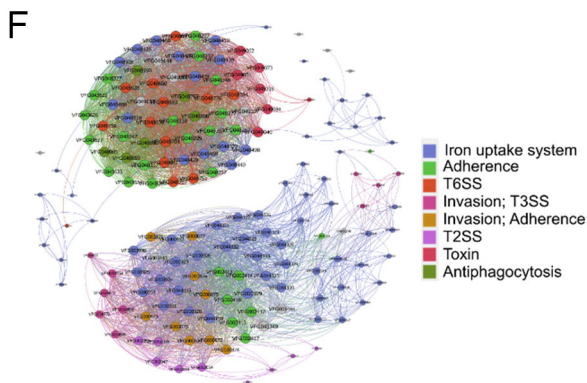



A

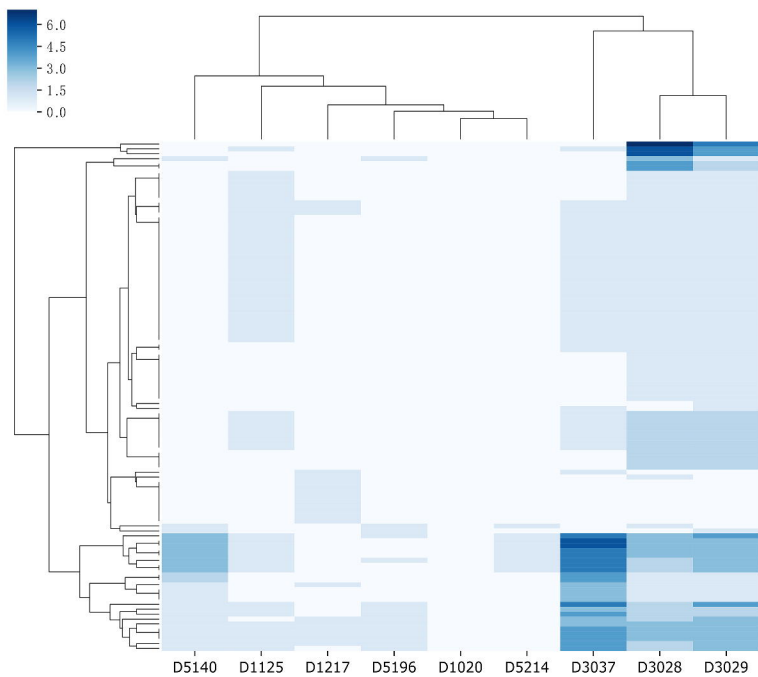

B

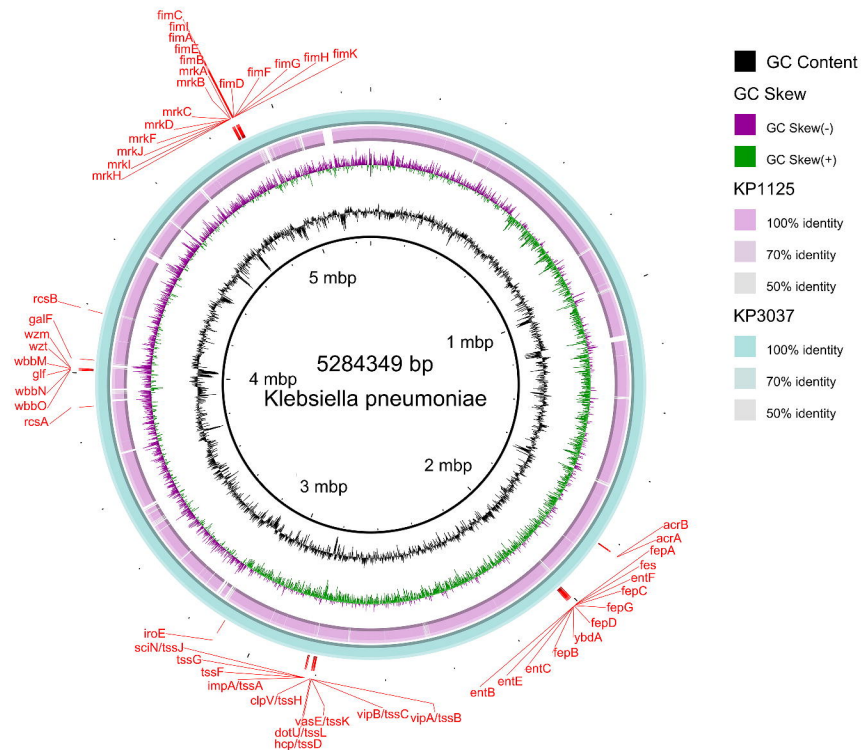

Source: https://www.biorxiv.org/content/10.1101/2020.12.13.403006v1.full.pdf
